# Supplementary material for: The impact of metabolic plasticity on winter energy use models
Source: Oxford University Press journal article supplement (doi:10.1242/jeb.243422), 2022-01-31
Supplement: jeb243422supp.pdf [file jeb243422supp.pdf]

**Table S1.** Model selection process for fitting  $\dot{V}O_2$  using a backwards reduced Kenward-Roger degrees of freedom method with the lmerTest package in R. The top three interaction terms were dropped based on F value reduction, leaving the final model of  $\dot{V}O_2$  as a dependent variable and month, acclimation, temperature, and the interaction of temperature and acclimation as fixed effects and individual as a random effect.

|                   | Eliminated | SumSq  | MeanSq | NumDF | DenDF  | F value | p-value |
|-------------------|------------|--------|--------|-------|--------|---------|---------|
| Temp:Acclim:Month | 1          | 0.338  | 0.1127 | 3     | 323.75 | 1.2143  | 0.3045  |
| Acclim:Month      | 2          | 0.2484 | 0.0828 | 3     | 102.35 | 0.8916  | 0.4482  |
| Temp:Month        | 3          | 0.4099 | 0.1366 | 3     | 326.51 | 1.4708  | 0.2223  |
| Month             | 0          | 9.0374 | 3.0125 | 3     | 105.61 | 32.2718 | <0.0001 |
| Mass              | 0          | 3.8236 | 3.8236 | 1     | 107.84 | 40.9613 | <0.0001 |
| Temp:Acclimation  | 0          | 0.5118 | 0.5118 | 1     | 329.28 | 5.4832  | 0.0198  |

**Table S2.** Linear mixed effect model results in an analysis of deviance table from type iii Walf F tests with Kenward-Roger degrees of freedom.

|                  | F         | Df | Df.res | p-value  |
|------------------|-----------|----|--------|----------|
| (Intercept)      | 351.4558  | 1  | 119.9  | <0.0001  |
| Temperature      | 2721.3077 | 1  | 330.63 | <0.0001  |
| Acclimation      | 9.7375    | 1  | 236.93 | 0.002029 |
| Month            | 32.2687   | 3  | 108.28 | <0.0001  |
| Mass             | 40.9553   | 1  | 110.54 | <0.0001  |
| Temp:Acclimation | 5.4822    | 1  | 331.93 | 0.019802 |

**Table S3.** ANOVA model results for lipid from each individual used for respirometry. Lipid data are triacylglyceride abundance quantified via TLC-FID (thin layer chromatography with flame ionization detector).

|                   | SumSq   | Df  | F value  | p-value |
|-------------------|---------|-----|----------|---------|
| (Intercept)       | 3.03246 | 1   | 113.4859 | <0.0001 |
| Month             | 0.22967 | 3   | 2.865    | 0.04015 |
| Acclimation       | 0.00021 | 1   | 0.0078   | 0.92966 |
| Month:Acclimation | 0.00388 | 3   | 0.0484   | 0.98584 |
| Residuals         | 2.83243 | 106 |          |         |

**Table S4.** ANOVA results from comparing error from model estimates of May lipid levels per model.

|             | SumSq   | Df | F value | p-value |
|-------------|---------|----|---------|---------|
| (Intercept) | 0.02668 | 1  | 1.0117  | 0.3173  |
| Model       | 0.01774 | 2  | 0.3364  | 0.7153  |
| Residuals   | 2.29449 | 87 |         |         |
